# Supplementary material
Source: bioRxiv or medRxiv preprint supplement (https://medrxiv.org/highwire/filestream/93603/field_highwire_adjunct_files/0/2020.08.17.20176347-1.pdf)
Supplement: Supplementary file [file 2020.08.17.20176347-1.pdf]

## SUPPLEMENTARY MATERIALS

Table S1. Model comparison using the leave-one-out (LOO) cross-validation method. We compared the full SIR model with other model variants, including SIR models with a different number of change points (Fig. S1-S2), without the weekend modulation (Fig. S3), and models from a sensitivity analysis with wider priors for the delay (Fig. 4), change points (Fig. S5) and change durations (Fig. S6). Lower LOO-score indicate better fit between model and data.

| <b>Model</b>                          | <b>Change points</b> | <b>LOO-score</b> | <b>pLOO</b> |
|---------------------------------------|----------------------|------------------|-------------|
| SIR main                              | 0                    | $598.9 \pm 13.4$ | 9.32        |
| SIR main                              | 1                    | $597.2 \pm 12.9$ | 8.14        |
| SIR main                              | 2                    | $595.5 \pm 12.5$ | 9.04        |
| <i>SIR main</i>                       | 3                    | $592.3 \pm 13$   | 9.88        |
| SIR without weekend modulation        | 3                    | $603.6 \pm 13.5$ | 7.87        |
| SIR with wider delay prior            | 3                    | $601.8 \pm 12.9$ | 13.21       |
| SIR with wider change points prior    | 3                    | $698.0 \pm 10.6$ | 41.27       |
| SIR with wider transient length prior | 3                    | $597.9 \pm 13.6$ | 12.09       |

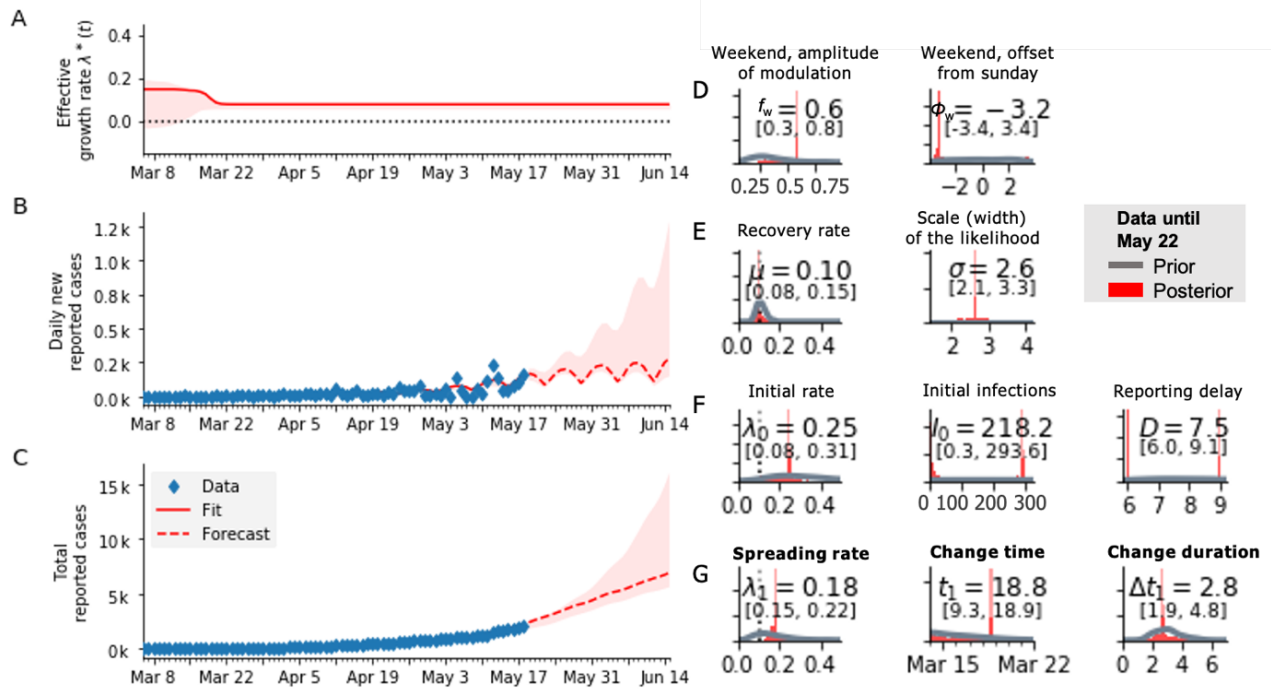

Figure S1. Full SIR model with **one change point** and weekly reporting modulation. All parameters and priors are the same as in the main text model (Fig.3), except number of change points. A: Estimate of the effective spreading rate; B: Daily new reported cases (blue diamonds) and the model (red solid line for median fit with 95% credible intervals). Red dashed line is the median forecast with 95% CI. C: Total reported cases and the model (color representation same as in B). D-F: Inference of central epidemiological parameters: prior (gray) and posterior distributions (red), inset values indicate the median and 95% CI of posteriors. G: Spreading rate, change time and change duration for the one change point, respectively.

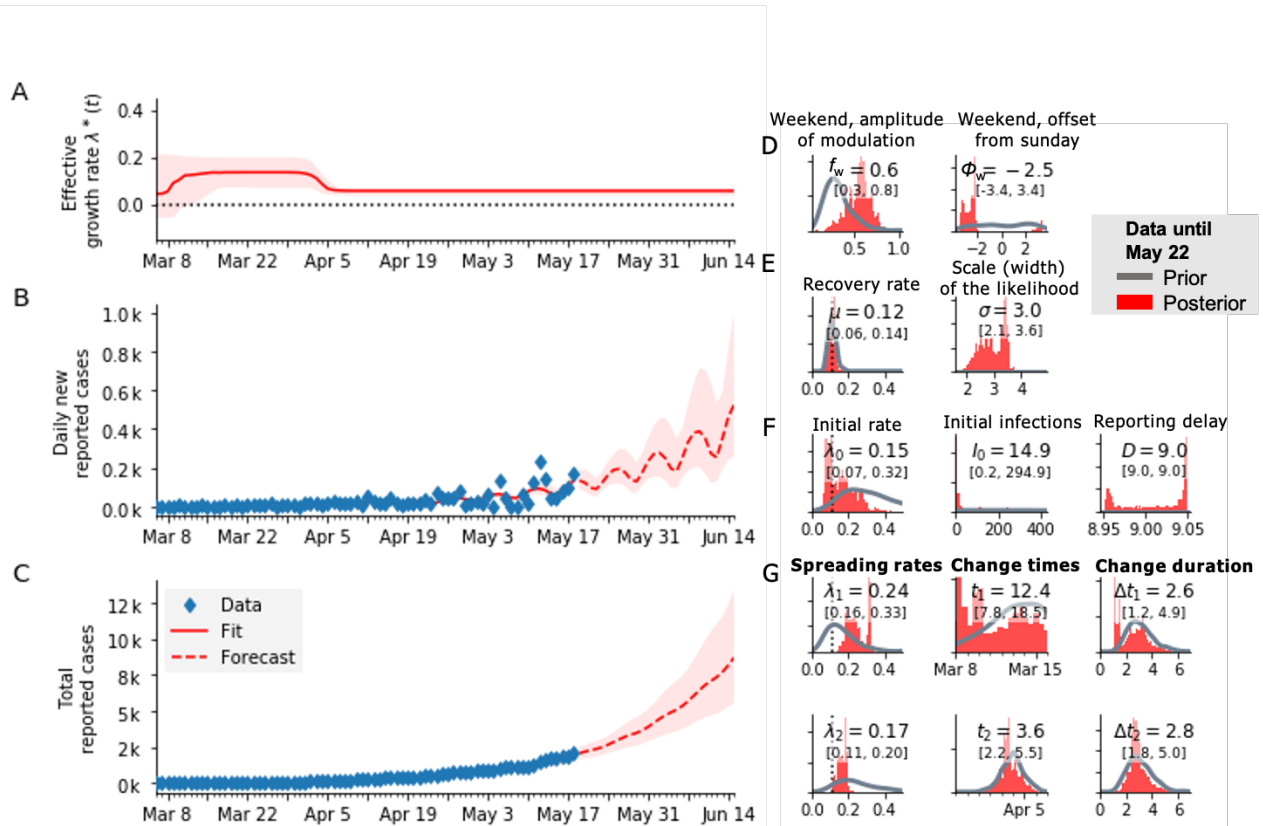

Figure S2. Full SIR model with **two change points** and weekly reporting modulation. All parameters and priors are the same as in the main text model (Fig.3), except number of change points. A: Estimate of the effective spreading rate; B: Daily new reported cases (blue diamonds) and the model (red solid line for median fit with 95% credible intervals). Red dashed line is the median forecast with 95% CI. C: Total reported cases and the model (color representation same as in B). D-F: Inference of central epidemiological parameters: prior (gray) and posterior distributions (red), inset values indicate the median and 95% CI of posteriors. G: Spreading rates, change times and change duration for the two change points, respectively.

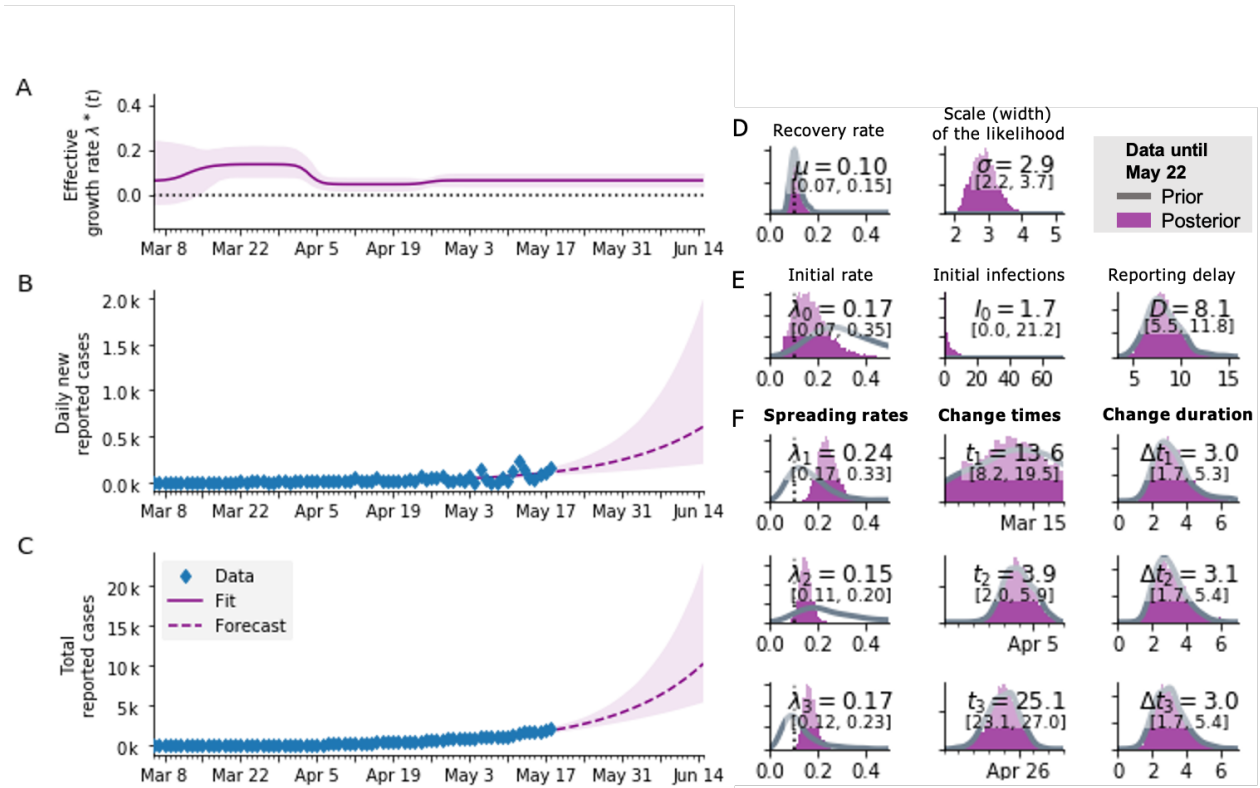

Figure S3. Full SIR model with three change points that **removes the weekly reporting modulation**. This model excludes the assumption that daily reported cases are lower during the weekend. All parameters and priors are the same as in the main text model (Fig.3). A: Estimate of the effective spreading rate; B: Daily new reported cases (blue diamonds) and the model (purple solid line for median fit with 95% credible intervals). Purple dashed line is the median forecast with 95% CI. C: Total reported cases and the model (color representation same as in B). D-F: Inference of central epidemiological parameters: prior (gray) and posterior distributions (purple), inset values indicate the median and 95% CI of posteriors. G: Spreading rates, change times and change duration for the three change points, respectively.

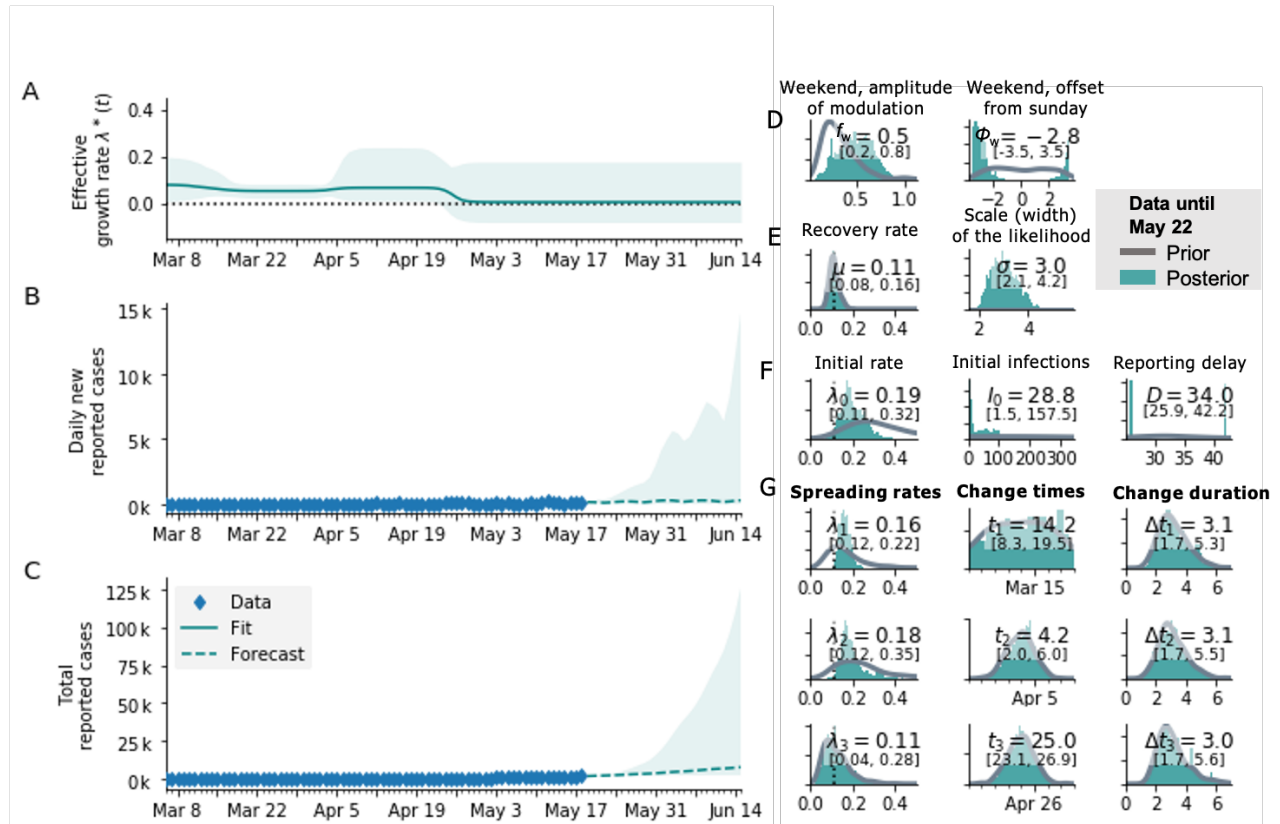

Figure S4. Sensitivity analysis. Full SIR model with three change points and weekly reporting modulation, but with a **wider prior for the reporting delay** (now 4 times wider). Other priors are the same as in the main text model (Fig.3). A: Estimate of the effective spreading rate; B: Daily new reported cases (blue diamonds) and the model (teal solid line for median fit with 95% credible intervals). Teal dashed line is the median forecast with 95% CI. C: Total reported cases and the model (color representation same as in B). D-F: Inference of central epidemiological parameters: prior (gray) and posterior distributions (teal), inset values indicate the median and 95% CI of posteriors. G: Spreading rates, change times and change duration for the three change points, respectively.

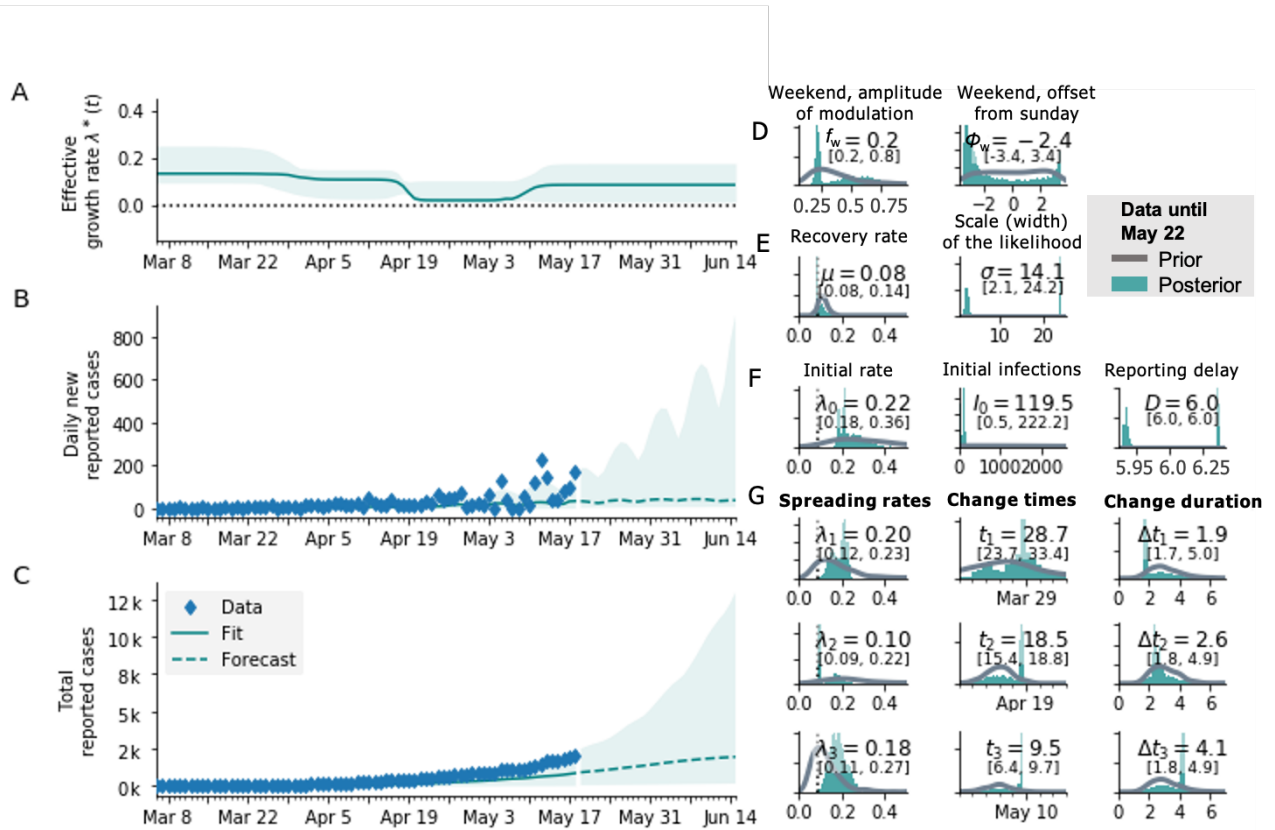

Figure S5. Sensitivity analysis. Full SIR model with three change points and weekly reporting modulation, but with a **wider prior for change points** (now 14 days instead of  $\sim 2$  days). Other priors are the same as in the main text model (Fig.3). A: Estimate of the effective spreading rate; B: Daily new reported cases (blue diamonds) and the model (teal solid line for median fit with 95% credible intervals). Teal dashed line is the median forecast with 95% CI. C: Total reported cases and the model (color representation same as in B). D-F: Inference of central epidemiological parameters: prior (gray) and posterior distributions (teal), inset values indicate the median and 95% CI of posteriors. G: Spreading rates, change times and change duration for the three change points, respectively.

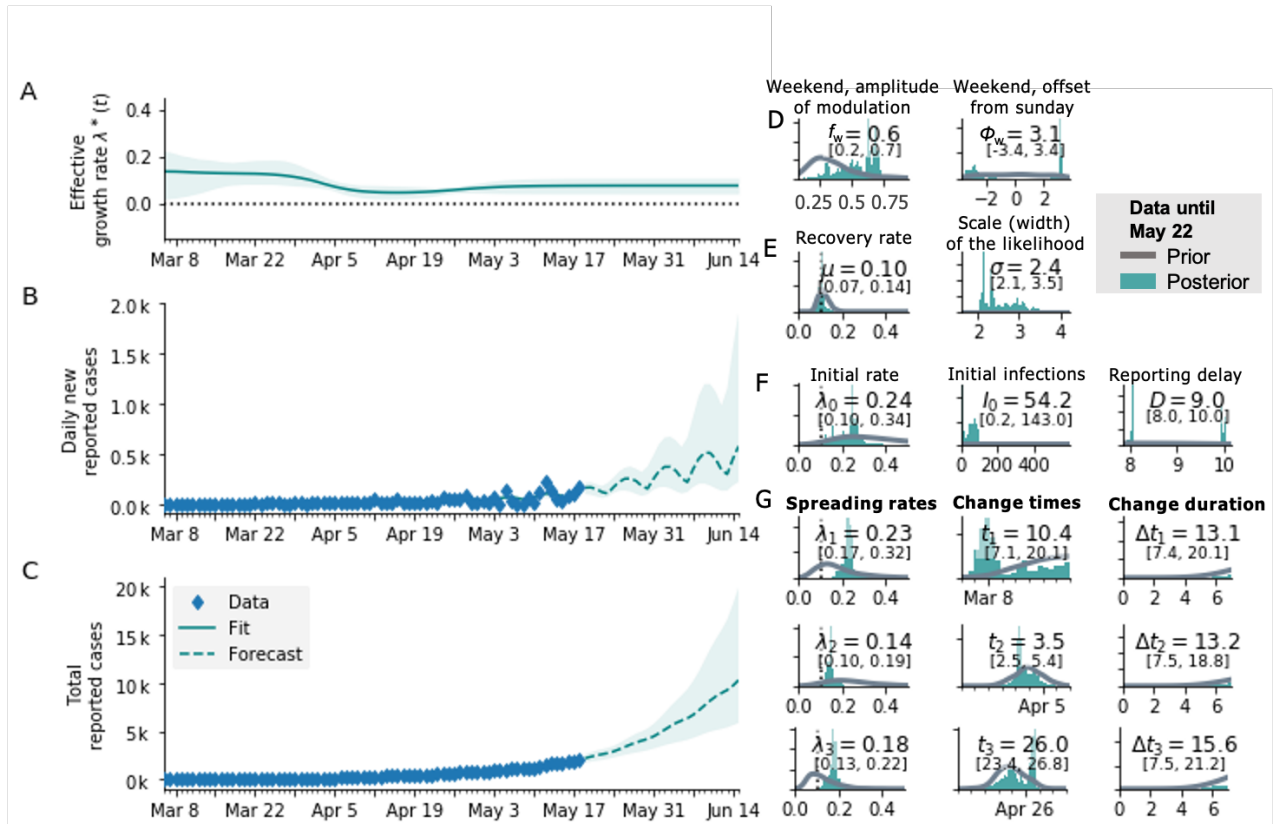

Figure S6. Sensitivity analysis. Full SIR model with three change points and weekly reporting modulation, but with a **wider prior for change durations** (now 4 times wider). Other priors are the same as in the main text model (Fig.3). A: Estimate of the effective spreading rate; B: Daily new reported cases (blue diamonds) and the model (teal solid line for median fit with 95% credible intervals). Teal dashed line is the median forecast with 95% CI. C: Total reported cases and the model (color representation same as in B). D-F: Inference of central epidemiological parameters: prior (gray) and posterior distributions (teal), inset values indicate the median and 95% CI of posteriors. G: Spreading rates, change times and change duration for the three change points, respectively.
